# Supplementary material for: Effects of Tail Pinch on BDNF and trkB Expression in the Hippocampus of Roman Low- (RLA) and High-Avoidance (RHA) Rats
Source: MDPI journal article supplement (doi:10.3390/ijms24119498), 2023-05-30
Supplement: s1 [file s1]

# Effects of Tail Pinch on BDNF and trkB Expression in the Hippocampus of Roman Low- (RLA) and High-Avoidance (RHA) rats

Maria Pina Serra <sup>1,†</sup>, Francesco Sanna <sup>2,†</sup>, Marianna Boi <sup>1</sup>, Marcello Trucas <sup>1</sup>, Alberto Fernández-Teruel <sup>3</sup>, Maria Giuseppa Corda <sup>2</sup>, Osvaldo Giorgi <sup>2,‡</sup> and Marina Quartu <sup>1,\*‡</sup>

<sup>1</sup> Department of Biomedical Sciences, Section of Cytomorphology, University of Cagliari, Cittadella Universitaria di Monserrato, 09042 Monserrato (CA), Italy; marianna.boi@unica.it (M.B.); marcello.trucas@unica.it (M.T.)

<sup>2</sup> Department of Life and Environmental Sciences, Section of Pharmaceutical, Pharmacological and Nutraceutical Sciences, University of Cagliari, Cittadella Universitaria di Monserrato, 09042 Monserrato, Italy

<sup>3</sup> Medical Psychology Unit, Department of Psychiatry and Legal Medicine & Institute of Neurosciences, School of Medicine, Autonomous University of Barcelona, Bellaterra, 08193 Barcelona, Spain

\* Correspondence: quartu@unica.it; Tel.: +39-070-675-4084

† These authors contributed equally to this work (joint first authors).

‡ These authors contributed equally to this work (joint senior authors).

**Table S1.** F values and significance levels of two-way ANOVAs performed on western blot data, shown in Figures 1 and 2.

| Brain Area  | Marker | Line    |        | TP    |         | Line × TP |         |      |
|-------------|--------|---------|--------|-------|---------|-----------|---------|------|
|             |        | F       | p      | F     | p       | F         | p       | d.f. |
| Dorsal      | BDNF   | 5.506   | 0.0263 | 28.74 | <0.0001 | 0.1175    | ns      | 1.28 |
| Hippocampus | trkB   | 0.04214 | ns     | 26.69 | ns      | 1,230     | <0.0001 | 1.28 |
| Ventral     | BDNF   | 8.730   | 0.0063 | 13.68 | 0.0009  | 3.438     | ns      | 1.28 |
| Hippocampus | trkB   | 7.049   | 0.0129 | 1.845 | 0.1852  | 6.271     | 0.0184  | 1.28 |

ns—not significant; d.f.—degrees of freedom.

**Table S2.** F values and significance levels of two-way ANOVAs performed on data obtained from the densitometric analysis of tissue section distribution of BDNF-like immunoreactivity (LI) and trkB-LI shown in Figures 1–4.

| Brain Area          | Marker | Line   |          | TP      |          | Line × TP |          |             |
|---------------------|--------|--------|----------|---------|----------|-----------|----------|-------------|
|                     |        | F      | <i>p</i> | F       | <i>p</i> | F         | <i>p</i> | <i>d.f.</i> |
| Dorsal Hippocampus  |        |        |          |         |          |           |          |             |
| CA1                 | BDNF   | 3.834  | 0.0566   | 3.963   | 0.0527   | 0.9296    | ns       | 1.44        |
|                     | trkB   | 6.169  | 0.0169   | 0.05298 | ns       | 0.6357    | ns       | 1.44        |
| CA2                 | BDNF   | 61.03  | <0.0001  | 29.13   | <0.0001  | 1.023     | ns       | 1.44        |
|                     | trkB   | 0.5791 | ns       | 0.1592  | ns       | 0.7378    | ns       | 1.44        |
| CA3                 | BDNF   | 51.66  | <0.0001  | 33.83   | <0.0001  | 16.5      | 0.0002   | 1.44        |
|                     | trkB   | 0.9633 | ns       | 0.02472 | ns       | 0.08183   | ns       | 1.44        |
| DG                  | BDNF   | 10.7   | 0.0021   | 4.792   | 0.0339   | 1.591     | ns       | 1.44        |
|                     | trkB   | 6.941  | 0.0116   | 5.439   | 0.0243   | 10.90     | 0.0019   | 1.44        |
| Ventral Hippocampus |        |        |          |         |          |           |          |             |
| CA1                 | BDNF   | 5.148  | 0.0282   | 6.545   | 0.0140   | 5.208     | 0.0274   | 1.44        |
|                     | trkB   | 8.681  | 0.0051   | 2.445   | ns       | 7.378     | 0.0094   | 1.44        |

|                                                      |      |        |         |         |        |         |    |      |
|------------------------------------------------------|------|--------|---------|---------|--------|---------|----|------|
| CA3                                                  | BDNF | 1.440  | ns      | 0.04668 | ns     | 0.01355 | ns | 1.44 |
|                                                      | trkB | 28.08  | <0.0001 | 0.01347 | ns     | 0.01355 | ns | 1.44 |
| DG                                                   | BDNF | 0.2088 | ns      | 1.780   | ns     | 0.5457  | ns | 1.44 |
|                                                      | trkB | 18.29  | 0.0001  | 5.391   | 0.0249 | 0.03890 | ns | 1.44 |
| ns—not significant; <i>d.f.</i> —degrees of freedom. |      |        |         |         |        |         |    |      |
